# Supplementary material for: Reduced Claudin-12 Expression Predicts Poor Prognosis in Cervical Cancer
Source: MDPI journal article supplement (doi:10.3390/ijms22073774), 2021-04-06
Supplement: s1 [file s1]

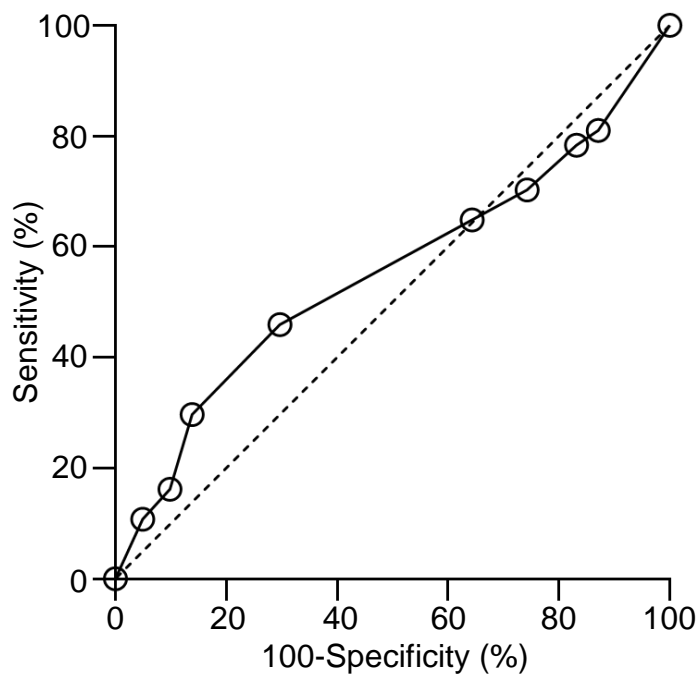

| IRS cut off | Sensitivity% | 95% CI           | Specificity% | 95% CI           | Likelihood ratio |
|-------------|--------------|------------------|--------------|------------------|------------------|
| < 0.5000    | 10.81        | 4.285% to 24.71% | 95.05        | 88.93% to 97.87% | 2.184            |
| < 1.500     | 16.22        | 7.651% to 31.14% | 90.1         | 82.73% to 94.53% | 1.638            |
| < 2.500     | 29.73        | 17.49% to 45.78% | 86.14        | 78.07% to 91.56% | 2.145            |
| < 3.500     | 45.95        | 31.04% to 61.62% | 70.3         | 60.77% to 78.33% | 1.547            |
| < 5.000     | 64.86        | 48.76% to 78.17% | 35.64        | 26.99% to 45.35% | 1.008            |
| < 7.000     | 70.27        | 54.22% to 82.51% | 25.74        | 18.22% to 35.05% | 0.9463           |
| < 8.500     | 78.38        | 62.80% to 88.61% | 16.83        | 10.78% to 25.31% | 0.9424           |
| < 10.50     | 81.08        | 65.80% to 90.52% | 12.87        | 7.679% to 20.78% | 0.9306           |

**Figure S1.** The receiver operating characteristic (ROC) curves for disease specific survival using cutoff score of CLDN12-immunoreactive score (IRS)  $\geq 3$ . CI, confidence interval.

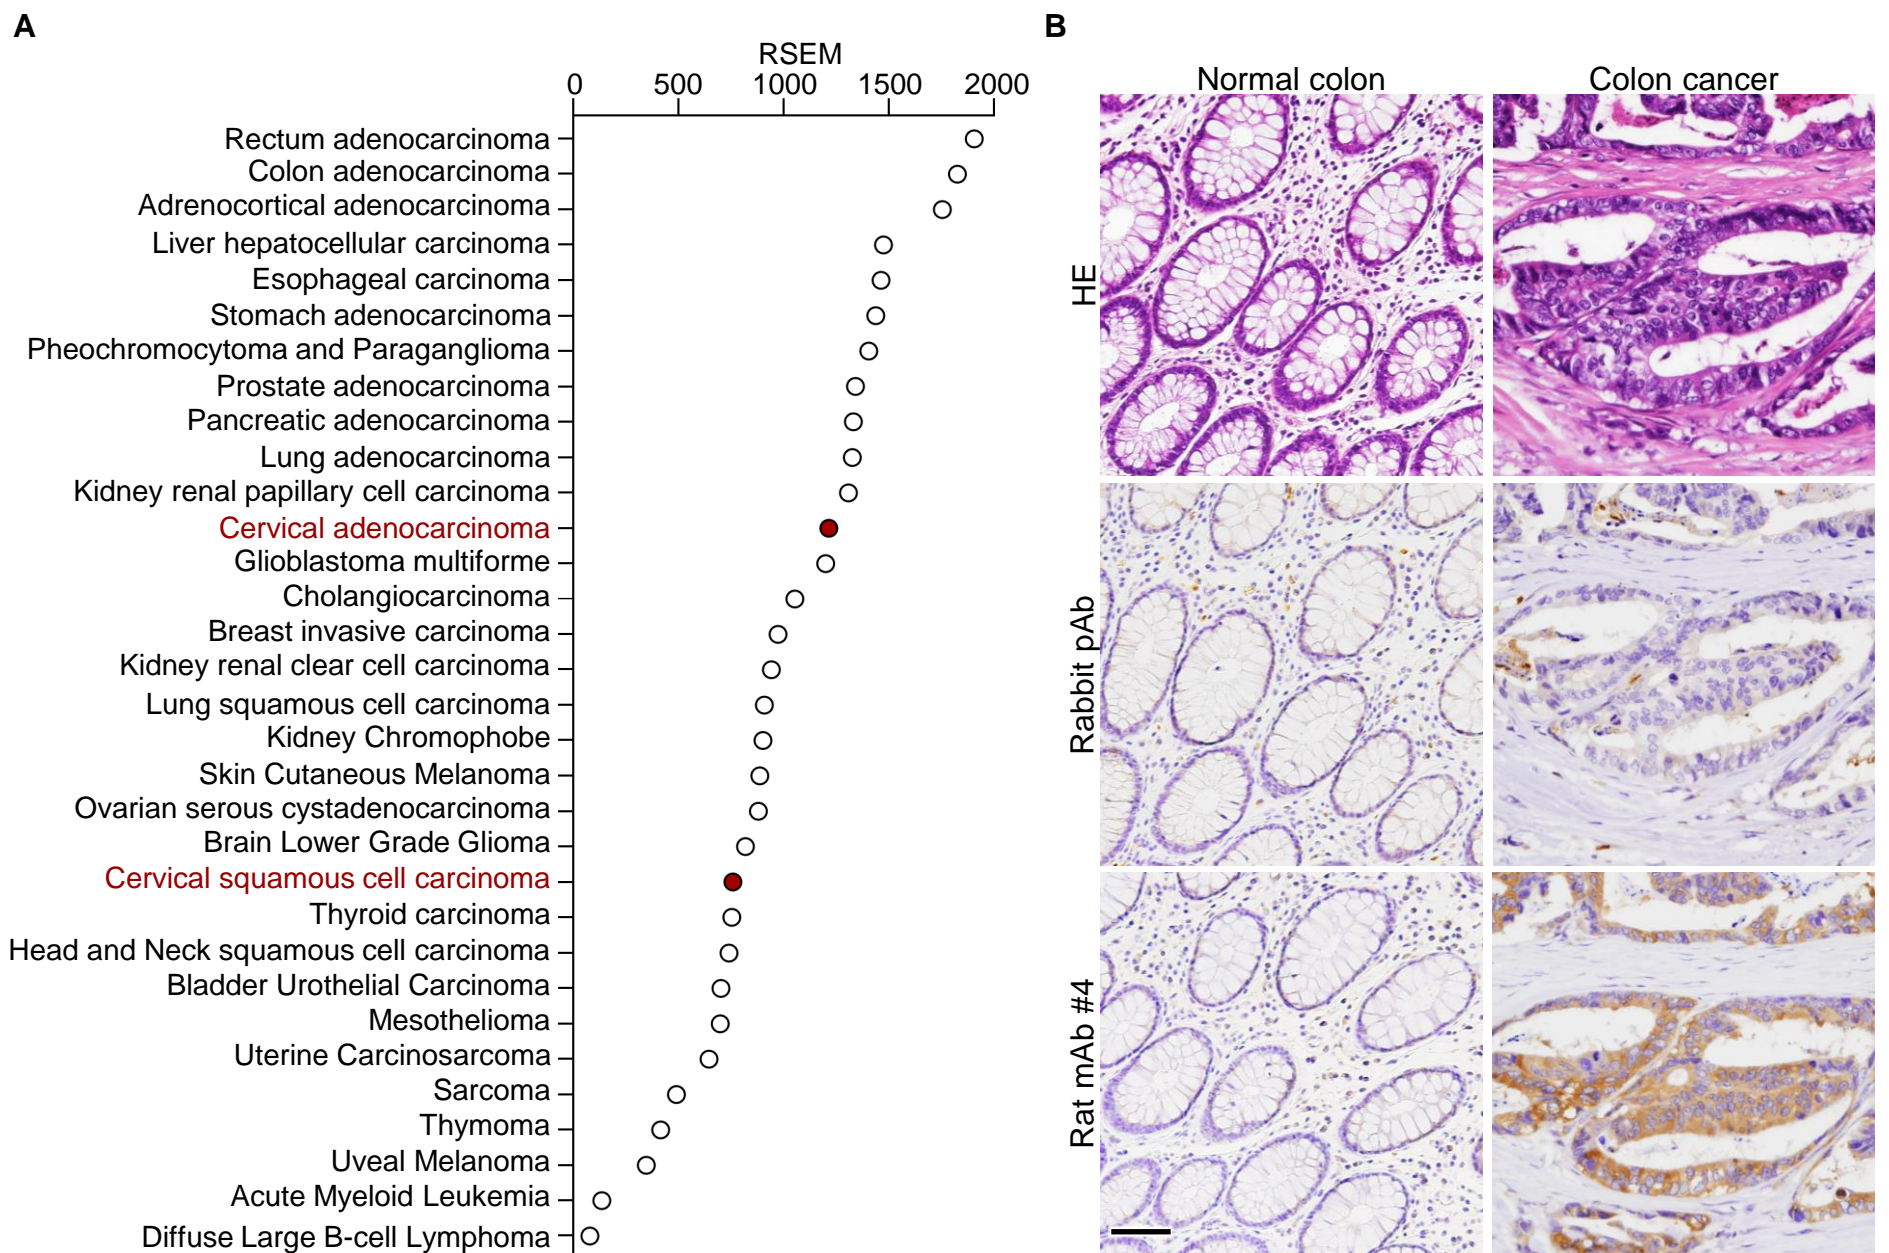

**Figure S2.** The *CLDN12* mRNA expression in various cancer tissues and the *CLDN12* protein expression in normal and malignant colon tissues. (A) Expression levels of *CLDN12* mRNA in the indicated cancer tissues were analysed using TCGA database. RSEM, RNA-Seq by Expectation-Maximization. (B) Normal and cancer tissues of the colon were immunohistochemically stained with the anti-*CLDN12* pAb and the anti-*CLDN12* mAb. HE, hematoxylin-eosin. Scale bar, 100  $\mu$ m.
